# Supplementary material for: The Impact of the COVID-19 Pandemic on Mental Health Care of Children and Adolescents in Switzerland: Results of a Survey among Mental Health Care Professionals after One Year of COVID-19
Source: MDPI journal article supplement (doi:10.3390/ijerph19063252), 2022-03-10
Supplement: s1 [file s1]

**Impact of the COVID-19 pandemic on mental health care of children and adolescents in Switzerland: Results of a survey among mental health care professionals after one year of COVID-19**

**Supplemental material**

**Table S1. If there was an increase in demand for treatment: How high was the increase at the time of greatest demand?**

|                               | N   | %    |
|-------------------------------|-----|------|
| About 20% more than usual     | 126 | 27.8 |
| Up to 50% more than usual     | 150 | 33.0 |
| About 50-100% more than usual | 72  | 15.9 |
| More than twice as much       | 41  | 9.0  |
| No increase                   | 18  | 4.0  |
| Not stated                    | 47  | 10.4 |

**Table S2. What was the waiting time for admission to treatment before the pandemic?**

|                          | N   | %    |
|--------------------------|-----|------|
| None / less than 1 month | 122 | 26.8 |
| 1 to less than 2 months  | 126 | 27.7 |
| 2 to less than 3 months  | 59  | 12.9 |
| 3 to less than 6 months  | 59  | 12.9 |
| More than 6 months       | 11  | 2.4  |
| No waiting lists/other   | 14  | 3.1  |
| Not stated               | 63  | 13.8 |
| Total                    | 454 | 100  |

**Table S3. What is the current waiting time for admission to treatment (March/April 2021)?**

|                                    | N   | %    |
|------------------------------------|-----|------|
| None / less than 1 month           | 50  | 10.9 |
| 1 to less than 2 months            | 61  | 13.4 |
| 2 to less than 3 months            | 50  | 11.0 |
| 3 to less than 6 months            | 137 | 30.1 |
| More than 6 months                 | 72  | 15.8 |
| No waiting lists/ Admission freeze | 27  | 5.9  |
| Not stated                         | 57  | 12.5 |
| Total                              | 454 | 100  |

**Table S4. Did it happen that treatments could not be conducted as planned because of the pandemic? If yes, why? Summary of free-text comments (N=79)**

|                                                                                   | N  |
|-----------------------------------------------------------------------------------|----|
| Therapy via telemental health                                                     | 23 |
| Telemental health not possible; rejected by patients, too difficult with children | 5  |
| Quarantine of patients or staff                                                   | 11 |
| COVID-19 rules/restriction of contact                                             | 9  |
| Institution closed due to COVID-19                                                | 4  |
| Focus on most urgent cases, sessions shortened, too many patients                 | 11 |
| Other                                                                             | 16 |

**Table S5. What was or is particularly stressful/ burdensome in your work under pandemic conditions? Summary of free-text comments (N=112)**

|                                                                                                                                                                                                                                                                                                                | N  |
|----------------------------------------------------------------------------------------------------------------------------------------------------------------------------------------------------------------------------------------------------------------------------------------------------------------|----|
| High number of cases, difficult triage; desperate families who cannot be helped due to the lack of free capacity; no possibility to refer to child and adolescent psychiatry due to lack of therapy places                                                                                                     | 40 |
| Increased organizational workload, impoverished team structures, staff shortages                                                                                                                                                                                                                               | 10 |
| Much more work taken on due to increased requests, but bordering on own overload                                                                                                                                                                                                                               | 9  |
| Own overload due to childcare under COVID-19, homeschooling                                                                                                                                                                                                                                                    | 7  |
| COVID-19 measures not always understandable; COVID-19 instructions often changing. Lack of prioritization of mental health during the pandemic and low appreciation of work for mentally ill children and adolescents; late vaccination of professionals in psychiatry, of professionals working with children | 11 |
| Own resources depleted because own recovery options also limited due to pandemic, general fatigue, uncertainty                                                                                                                                                                                                 | 7  |
| Lack of financial coverage of online care at the beginning of the pandemic, lack of clarity especially for psychologists                                                                                                                                                                                       | 5  |
| Online therapy sessions at the beginning very helpful, later very tiring                                                                                                                                                                                                                                       | 4  |
| Difficult to work wearing a mask with children                                                                                                                                                                                                                                                                 | 4  |
| Lack of separation of professional and private life due to online sessions at home                                                                                                                                                                                                                             | 4  |
| General criticism of COVID-19 policy, COVID-19-related measures                                                                                                                                                                                                                                                | 3  |
| Many last-minute cancellations from parents due to quarantine                                                                                                                                                                                                                                                  | 3  |
| Concern for own ill family members, team members                                                                                                                                                                                                                                                               | 3  |
| Concern about having to quarantine oneself and then not being able to work                                                                                                                                                                                                                                     | 2  |
| Other                                                                                                                                                                                                                                                                                                          | 7  |

**Table S6. Have there also been positive aspects of the pandemic for your work or for you personally?**

|                                                                                                                                                                                                         | N   | %    |
|---------------------------------------------------------------------------------------------------------------------------------------------------------------------------------------------------------|-----|------|
| No positive aspects                                                                                                                                                                                     | 147 | 32.4 |
| Yes                                                                                                                                                                                                     | 280 | 61.7 |
| Not stated                                                                                                                                                                                              | 27  | 5.9  |
| <b>If yes, please describe (summary of free-text comments) (N=280)</b>                                                                                                                                  |     |      |
|                                                                                                                                                                                                         | N   |      |
| Familiarization with new techniques, experience with video therapy/ telemental health, easier to bring together all actors/family members via video session, possibility to carry out video conferences | 128 |      |
| Concentration on the essential, deceleration (during lockdown)                                                                                                                                          | 45  |      |
| Benefits of working from home: no commute, quieter environment, more partnership in childcare, less travelling to meetings                                                                              | 35  |      |
| Online continuous education                                                                                                                                                                             | 28  |      |
| Core family moves closer together, more time with children                                                                                                                                              | 19  |      |
| Less stress during leisure time                                                                                                                                                                         | 17  |      |
| More conscious use of own resources                                                                                                                                                                     | 12  |      |
| More cohesion, within the family and among colleagues                                                                                                                                                   | 10  |      |
| Better ecological balance, less noise                                                                                                                                                                   | 9   |      |
| Some patients have benefited                                                                                                                                                                            | 5   |      |
| Other                                                                                                                                                                                                   | 20  |      |
